# Supplementary material for: Human immunodeficiency virus integrase inhibitors efficiently suppress feline immunodeficiency virus replication in vitro and provide a rationale to redesign antiretroviral treatment for feline AIDS
Source: PubMed Central journal article supplement (PMC2244644; doi:10.1186/1742-4690-4-79), 2007-10-30
Supplement: 1742-4690-4-79-S1.pdf [file 1742-4690-4-79-S1.pdf]

# MolProbity Ramachandran analysis

FIV\_PETALUMA\_H\_MINIMIZED\_clean\_pdbv3.pdb, model 1

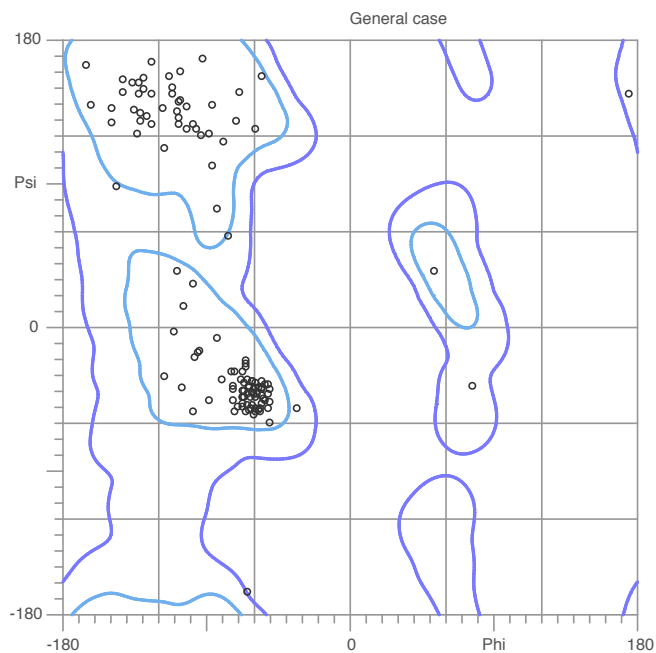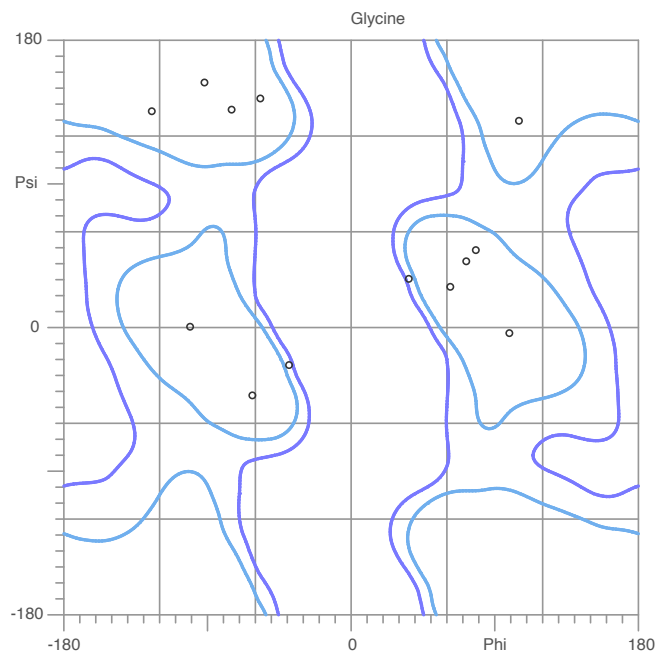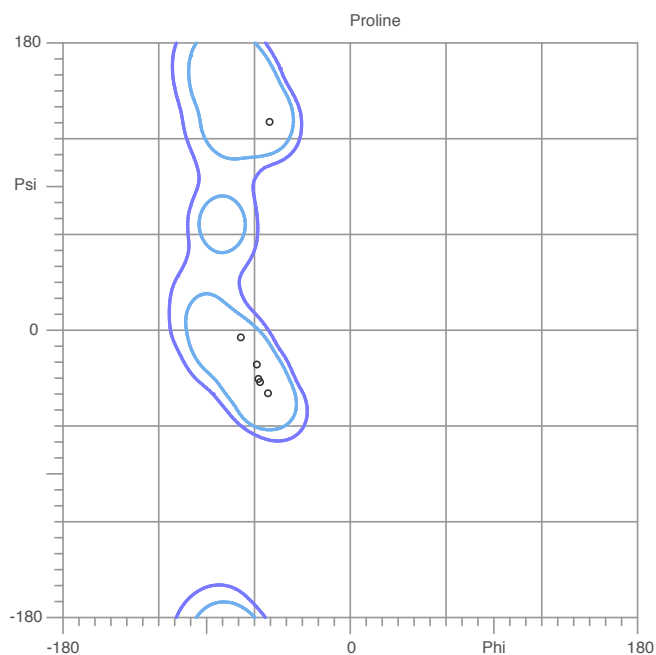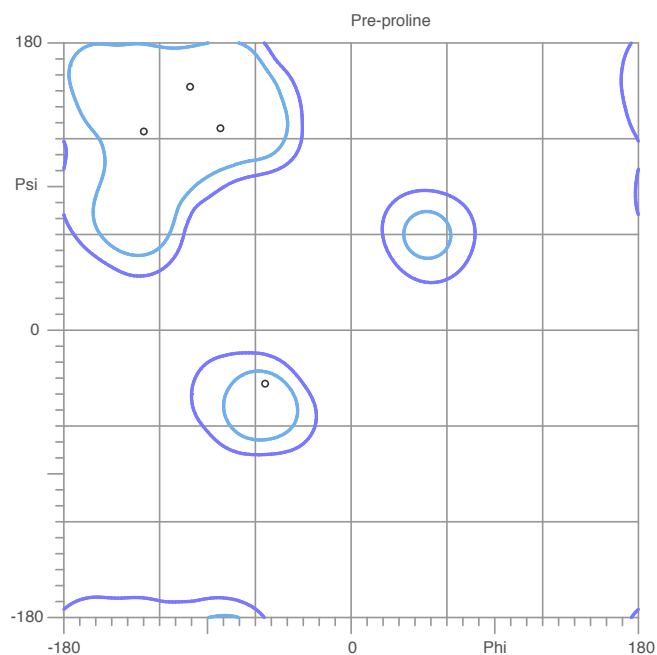

95.3% (141/148) of all residues were in favored (98%) regions.  
100.0% (148/148) of all residues were in allowed (>99.8%) regions.

There were no outliers.

<http://kinemage.biochem.duke.edu>

Lovell, Davis, et al. Proteins 50:437 (2003)
